# Supplementary material for: Unmet Need for Specialty Mental Health Services Among Children Across Europe
Source: Atypon-hosted journal article supplement (doi:10.1176/appi.ps.201600409), 2017-04-03
Supplement: appi.ps.201600409.ds001.pdf [file appi.ps.201600409.ds001.pdf]

Appendix.

**Country-specific ethical approvals:**

All participating countries received approval from relevant local ethical review boards, including their ministers of education . Bulgaria: Republic of Bulgaria, Deputy Minister of Education, Youth and Science; Germany: Ministry of Education, Science and Culture, Mecklenburg-Vorpommern, State school authority, Luneburg, Ministry of Education and Culture of Schleswig-Holstein country; Italy: Ethical Committee of the Association of European University Mediterranean ONLUS; Lithuania: Republic of Lithuania—Ministry of Education and Science; Netherlands: Commission of Faculty Ethical Behavior Research (ECG); Romania: Bucharest School Inspectorate General Municipal; Turkey: Istanbul—directorate of National Education.
